# Supplementary material
Source: MDPI journal article supplement (https://www.mdpi.com/1099-4300/18/8/299)
Supplement: s1 [file s1]

# Supplementary Materials: Determining the Entropic Index $q$ of Tsallis Entropy in Images through Redundancy

Abdiel Ramírez-Reyes, Alejandro Raúl Hernández-Montoya, Gerardo Herrera-Corral and Ismael Domínguez-Jiménez

Algorithms S1–S4 summarize the pseudocode of all algorithms applied in our image processing.

---

**Algorithm S1:** Procedure index  $q$  of an image.

---

**input** : A digital grayscale image  $I_1$  of 8 bits and size  $M \times N$ .

**output**:  $q$ -index of  $I_1$

**begin**

1. Let  $I_1$  be the input image.
2. Calculate the histogram.
3. Normalize this histogram to obtain the probability distribution, where  $0 \geq p_i \geq 255$ .  
If  $p_i = 0$ , remove it from the distribution.
4. For each  $i = -2 + 0.01 \times i$ , for  $i = 0$  until  $i = 1200$ , calculate  $S_T$  and  $S_{T_{\max}}$  according to Equations (2) and (4) with  $k = 1$ .
5. Plot  $R_T$  versus  $q$  and find the maximum.
6. Index  $q \in [-2, 10]$  associated with the previous maximum is the characteristic entropic index of the image  $I_1$ .

**end**

---

---

**Algorithm S2:** Procedure Shannon and Tsallis entropy of an image.

---

**input** : A digital grayscale image  $I_1$  of 8 bits and size  $M \times N$  and index  $q$ .

**output**: Shannon and Tsallis entropy of  $I_1$ .

**begin**

1. Let  $I_1$  be the input image.
2. Calculate the histogram.
3. Normalizing the histogram to obtain the probability distribution, where  $0 \geq p_i \geq 255$ .  
If  $p_i = 0$ , remove it from the distribution.
4. For the  $q$  index, calculate  $S_S$  and  $S_T$  according to Equations (4) and (9) with  $k = 1$ .

**end**

---

---

**Algorithm S3:** Procedure image segmentation using Tsallis entropy.

---

**input** : A digital grayscale image  $I_1$  of 8 bits and size  $M \times N$  and index  $q$ .

**output**: A digital binarized image  $I_2$  of size  $M \times N$ .

**begin**

1. Let  $I_1$  be the input image.
2. Calculate the histogram.
3. Normalizing the histogram to obtain the probability distribution, where  $0 \leq p_i \leq 255$ .
4. For each  $t \in \{0, 1, \dots, 255\}$ 
  - (a) Calculate  $P_A$  and  $P_B$ , and normalize to obtain  $p_A$  and  $p_B$ .
  - (b) Calculate  $t^*(q) = \arg \max_{t \in G} [S_T^A(t) + S_T^B(t)]$ .
5. Thresholding the image  $I_1$  with  $t^*$  to obtain  $I_2$ , it is a binarized image by thresholding of size  $M \times N$ .

**end**

---

---

**Algorithm S4:** Procedure edge detection.

---

**input** : A digital binarized image  $I_2$  of size  $M \times N$ .

**output**: A digital binarized image with edge  $I_3$  of size  $M \times N$ .

**begin**

1. Let  $I_2$  be the input image.
2. Convolve  $I_2$  with Sobel filter to obtain  $I_3$ .
3. Calculate the complement of  $I_3$ ; it is the image of detected edges of size  $M \times N$ .

**end**

---

Note: the last two algorithms were also used, but the Shannon entropy  $S_S(q = 1)$ , in order to show the Tsallis entropy advantages.
